# Supplementary material for: Supramolecular organogels and nanowires based on a V-shaped cyanostilbene amide derivative with aggregation-induced emission (AIE) properties
Source: Royal Society of Chemistry journal article supplement (doi:10.1039/c3tc30545g), 2013-01-01
Supplement: c3tc30545g.pdf [file c3tc30545g.pdf]

# Supporting Information

## **Supramolecular organogels and nanowires based on a V-shaped cyanostilbene amide derivative with aggregation-induced emission (AIE) property**

*Yuping Zhang, Chunshuang Liang, Hongxing Shang, Yao Ma and Shimei Jiang\**

State Key Laboratory of Supramolecular Structure and Materials, Jilin University,  
2699 Qianjin Avenue, Changchun 130012, P. R. China

**Corresponding Author: E-mail:** smjiang@jlu.edu.cn. Tel: +86-431-85168474. Fax:  
+86-431-85193421.

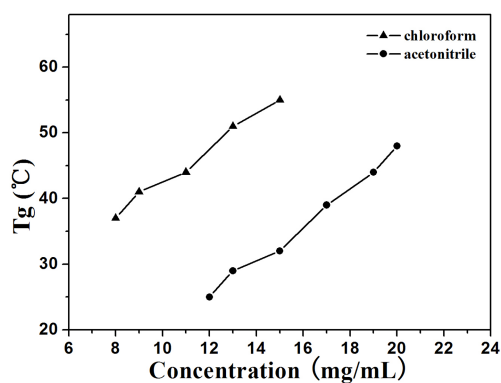

**Figure S1.** Plot of T<sub>g</sub> versus concentration of BPBIA in chloroform and acetonitrile.

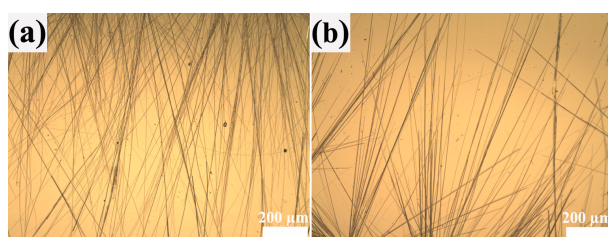

**Figure S2.** Optical images of nanowires cast on (a) quartz and (b) glass substrates.

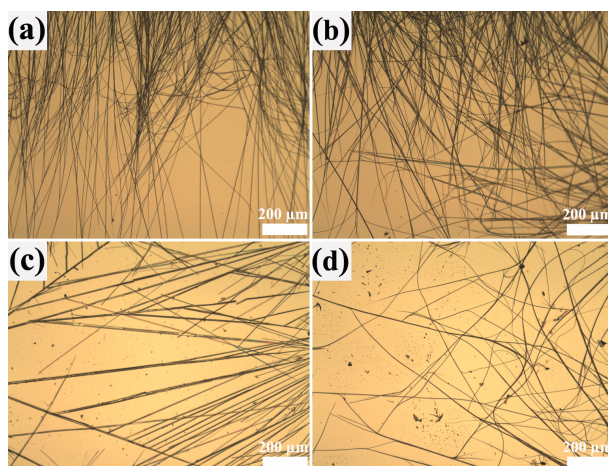

**Figure S3.** Optical images of nanowires cast from different solvents (a) 1,2-dichloroethane, (b) acetonitrile, (c) 1,4-dioxane, and (d) THF on silicon substrate.

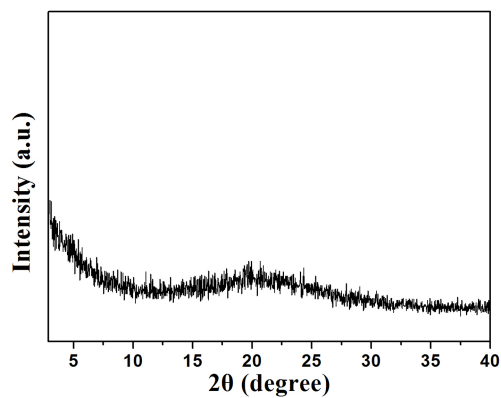

**Figure S4.** XRD pattern of BPBIA amorphous powder.

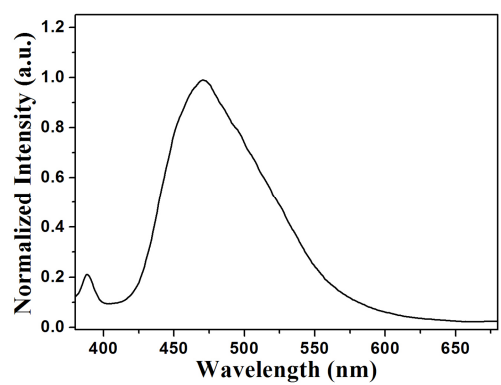

**Figure S5.** Normalized fluorescence spectrum of BPBIA amorphous powder.

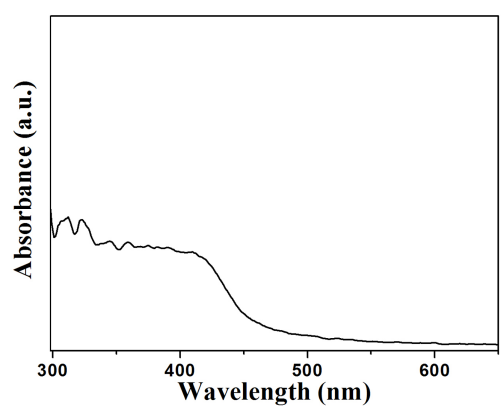

**Figure S6.** Normalized absorption spectrum of BPBIA amorphous powder.
